# Supplementary material for: Metamaterials with amplitude gaps for elastic solitons
Source: PubMed Central journal article supplement (PMC6109112; doi:10.1038/s41467-018-05908-9), 2018-08-24
Supplement: 41467_2018_5908_MOESM2_ESM.pdf [file 41467_2018_5908_MOESM2_ESM.pdf]

**Editorial Note:** This manuscript has been previously reviewed at another journal that is not operating a transparent peer review scheme. The manuscript was considered suitable for publication without further review at Nature Communications.
